# Supplementary material for: Imprinted micelles for chiral recognition in water: shape, depth, and number of recognition sites
Source: Royal Society of Chemistry journal article supplement (doi:10.1039/c7ob00764g), 2017-01-01

## Electronic Supplementary Information

### Imprinted Micelles for Chiral Recognition in Water: Shape, Depth, and Number of Recognition Sites

Joseph K. Awino and Yan Zhao\*

*Department of Chemistry, Iowa State University, Ames, Iowa 50011-3111, USA*

#### Table of Contents

|                                                      |    |
|------------------------------------------------------|----|
| Figure S1 .....                                      | 2  |
| Figure S2 .....                                      | 2  |
| Figure S3 .....                                      | 3  |
| Figure S4 .....                                      | 3  |
| Figure S5 .....                                      | 4  |
| Figure S6 .....                                      | 4  |
| Figure S7 .....                                      | 5  |
| Figure S8 .....                                      | 5  |
| Figure S9 .....                                      | 6  |
| Figure S10 .....                                     | 6  |
| Figure S11 .....                                     | 7  |
| Figure S12 .....                                     | 7  |
| Figure S13 .....                                     | 8  |
| Figure S14 .....                                     | 8  |
| Figure S15 .....                                     | 9  |
| Figure S16 .....                                     | 9  |
| Figure S17 .....                                     | 10 |
| Figure S18 .....                                     | 10 |
| Figure S19 .....                                     | 11 |
| <sup>1</sup> H and <sup>13</sup> C NMR spectra ..... | 12 |

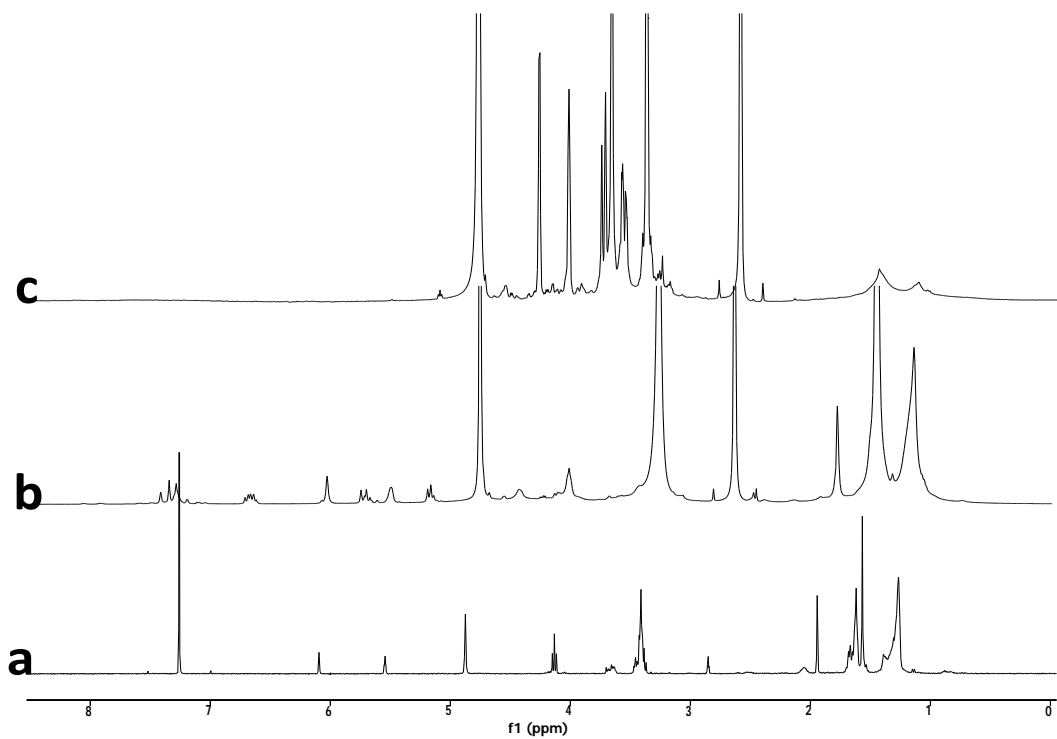

**Figure S1.** <sup>1</sup>H NMR spectra of: (a) **1** in CDCl<sub>3</sub>, (b) alkynyl-SCM in D<sub>2</sub>O, and (c) MINP(**4**) in D<sub>2</sub>O.

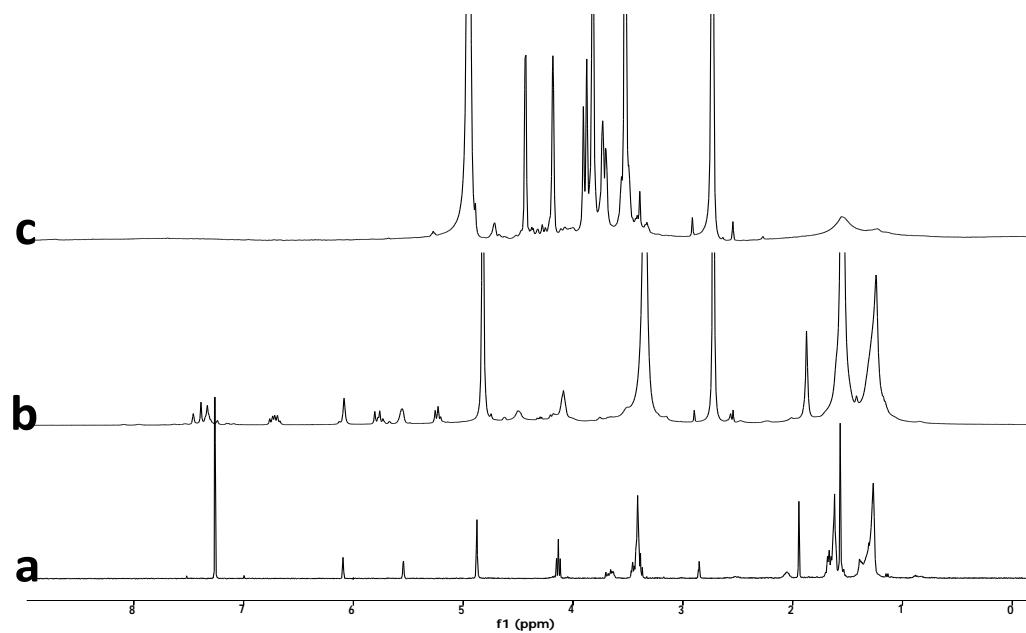

**Figure S2.** <sup>1</sup>H NMR spectra of: (a) **1** in CDCl<sub>3</sub>, (b) alkynyl-SCM in D<sub>2</sub>O, and (c) MINP(**6**) in D<sub>2</sub>O.

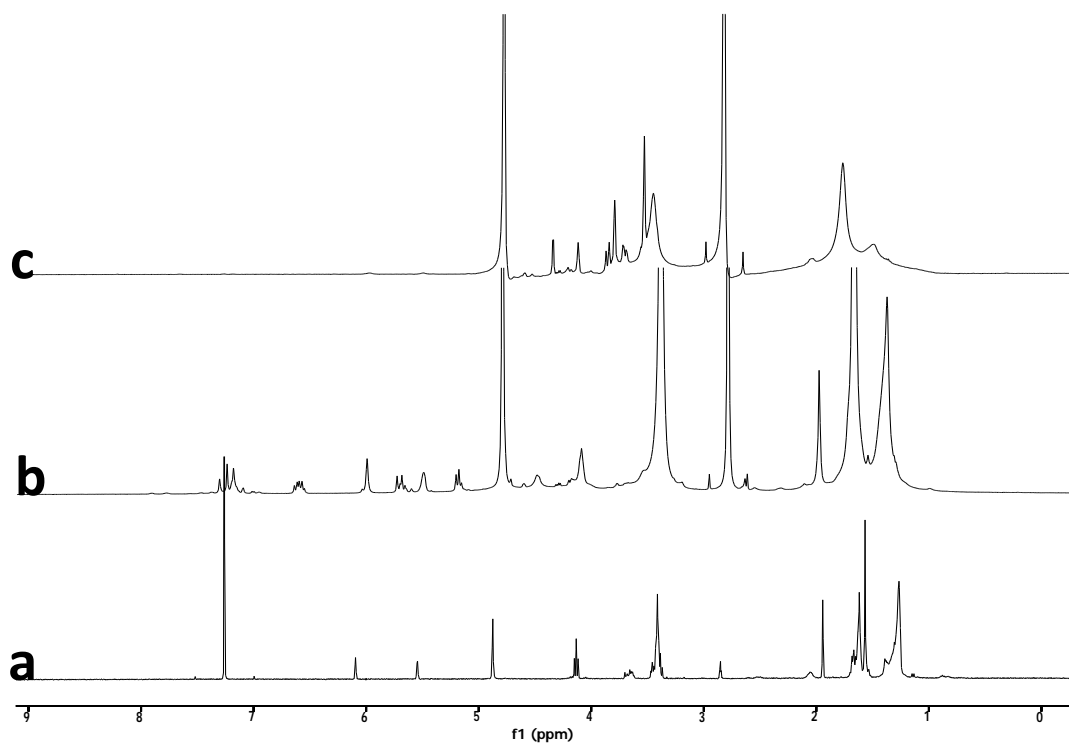

**Figure S3.** <sup>1</sup>H NMR spectra of: (a) **1** in CDCl<sub>3</sub>, (b) alkyne-SCM in D<sub>2</sub>O, and (c) MINP(7) in D<sub>2</sub>O.

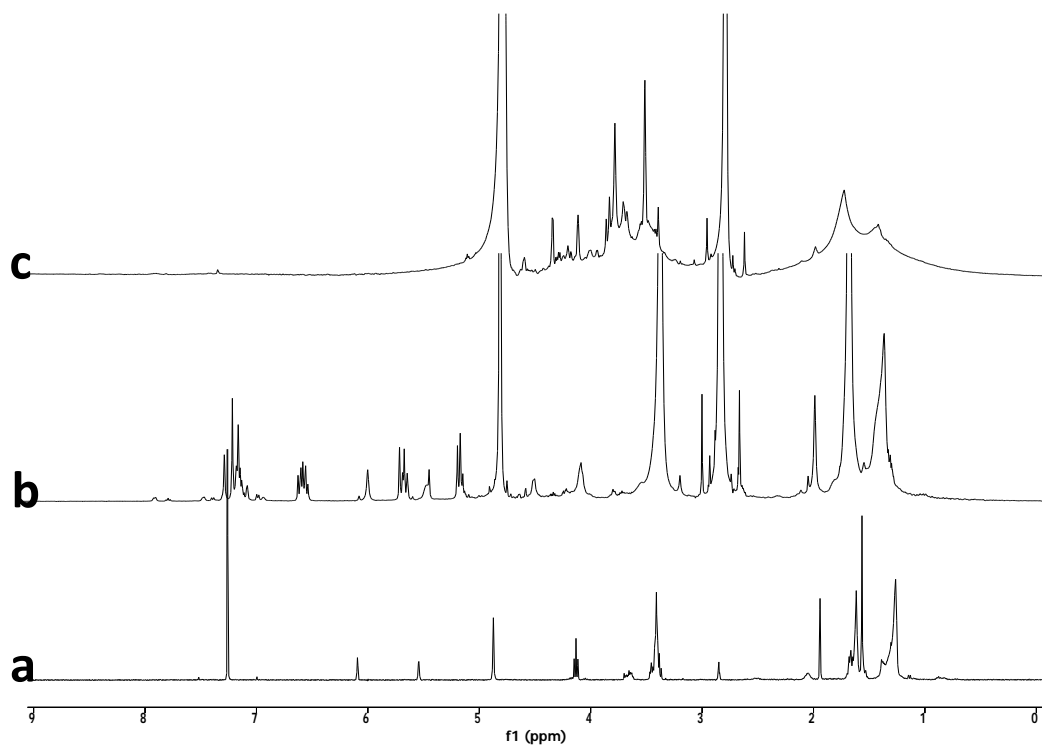

**Figure S4.** <sup>1</sup>H NMR spectra of: (a) **1** in CDCl<sub>3</sub>, (b) alkyne-SCM in D<sub>2</sub>O, and (c) MINP(10) in D<sub>2</sub>O.

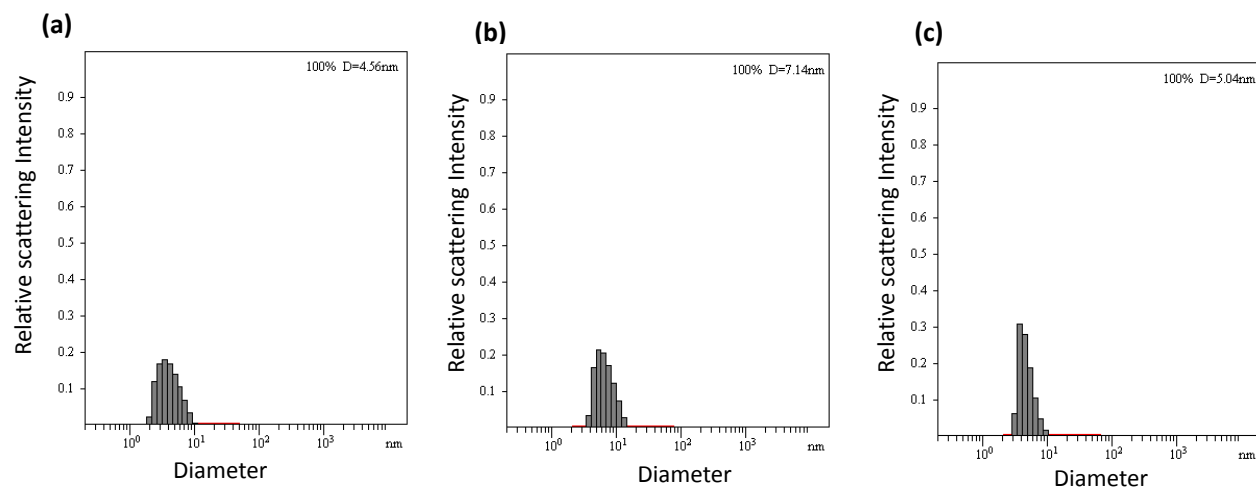

**Figure S5.** Distribution of the hydrodynamic diameters of the nanoparticles in water as determined by DLS for (a) alkynyl-SCM, (b) surface-functionalized SCM and (c) MINP(4) after purification.

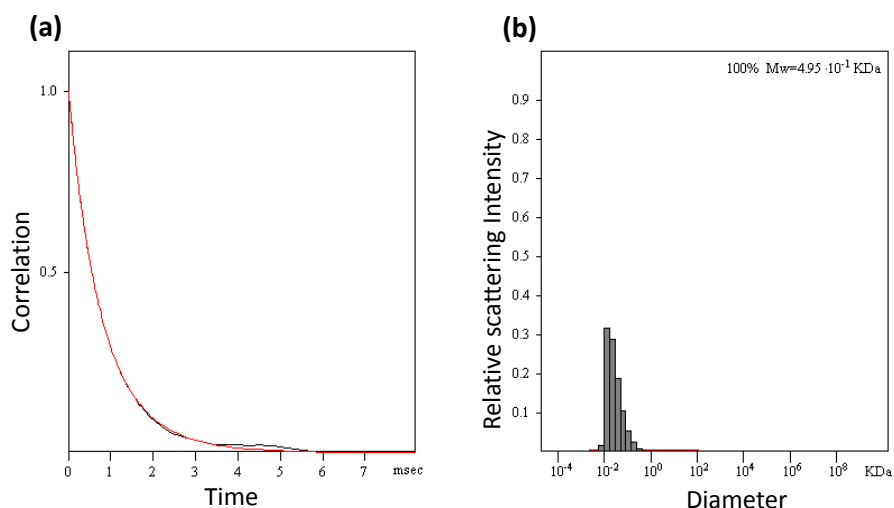

**Figure S6.** Distribution of the molecular weights and the correlation curves for MINP(4) from the DLS. The PRECISION DECONVOLVE program assumes the intensity of scattering is proportional to the mass of the particle squared. If each unit of building block for the MINP is assumed to contain one molecule of compound **1** (MW = 465 g/mol), 1.2 molecules of compound **2** (MW = 172 g/mol), one molecule of DVB (MW = 130 g/mol), 0.8 molecules of compound **3** (MW = 264 g/mol), and 0.04 molecules of 4-vinylphenylboronic acid (MW = 148 g/mol), the molecular weight of MINP translates to 49 [= 49500 / (465 + 1.2×172 + 130 + 0.8×264 + 0.04×148)] of such units.

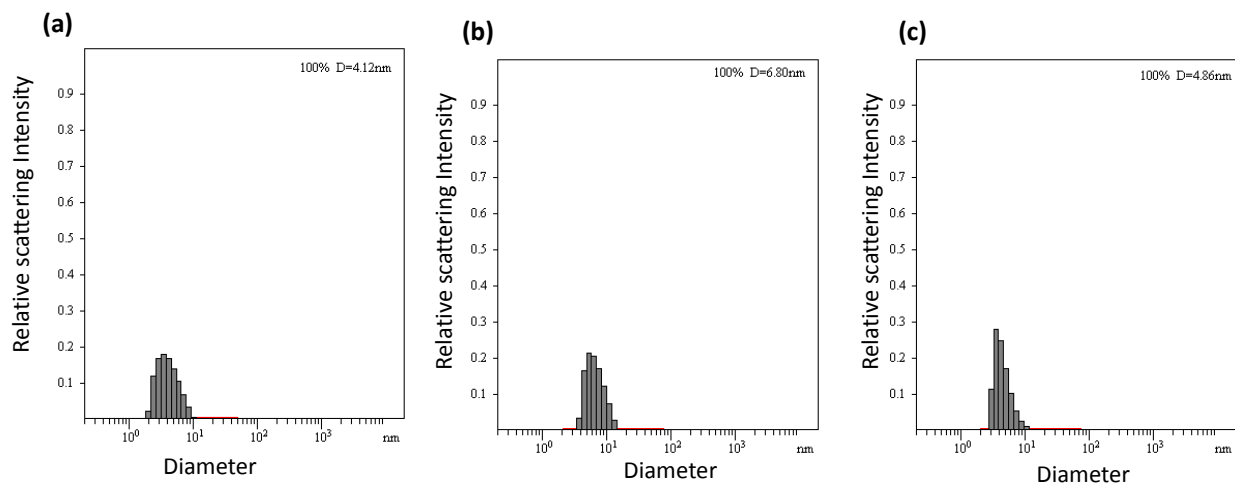

**Figure S7.** Distribution of the hydrodynamic diameters of the nanoparticles in water as determined by DLS for (a) alkynyl-SCM, (b) surface-functionalized SCM and (c) MINP(6) after purification.

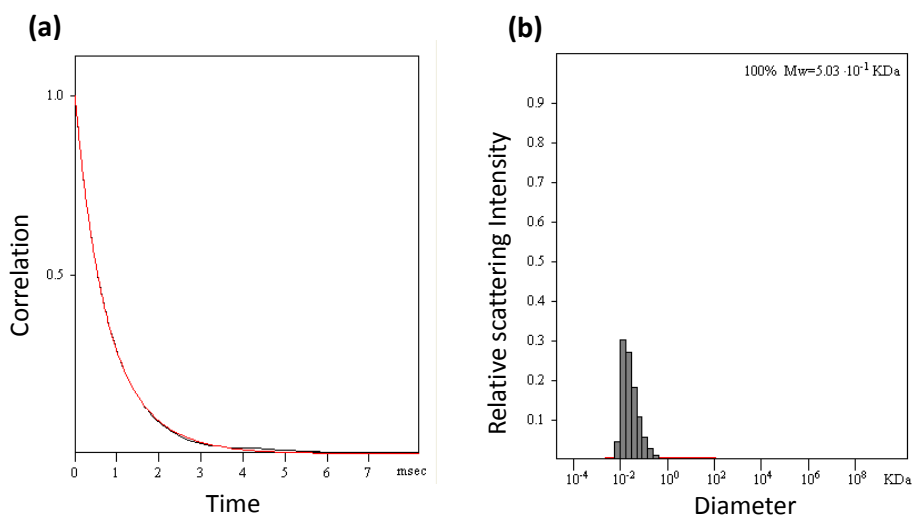

**Figure S8.** Distribution of the molecular weights and the correlation curves for MINP(6) from the DLS. The PRECISION DECONVOLVE program assumes the intensity of scattering is proportional to the mass of the particle squared. If each unit of building block for the MINP is assumed to contain one molecule of compound **1** (MW = 465 g/mol), 1.2 molecules of compound **2** (MW = 172 g/mol), one molecule of DVB (MW = 130 g/mol), and 0.8 molecules of compound **3** (MW = 264 g/mol), the molecular weight of MINP translates to 50 [= 50300 / (465 + 1.2×172 + 130 + 0.8×264)] of such units.

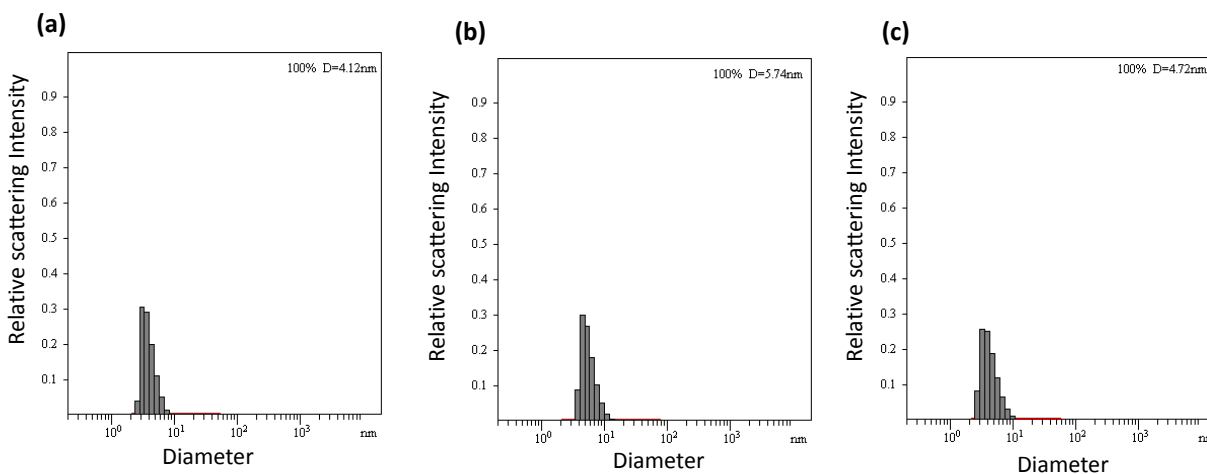

**Figure S9.** Distribution of the hydrodynamic diameters of the nanoparticles in water as determined by DLS for (a) alkynyl-SCM, (b) surface-functionalized SCM and (c) MINP(7) after purification.

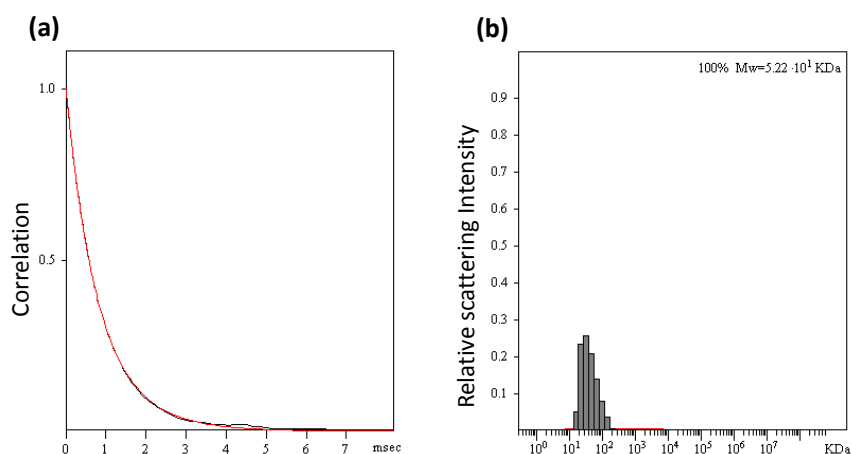

**Figure S10.** Distribution of the molecular weights and the correlation curves for MINP(7) from the DLS. The PRECISION DECONVOLVE program assumes the intensity of scattering is proportional to the mass of the particle squared. If each unit of building block for the MINP is assumed to contain one molecule of compound **1** (MW = 465 g/mol), 1.2 molecules of compound **2** (MW = 172 g/mol), one molecule of DVB (MW = 130 g/mol), 0.8 molecules of compound **3** (MW = 264 g/mol), and 0.04 molecules of 4-vinylphenylboronic acid (MW = 148 g/mol), the molecular weight of MINP translates to 52 [= 52200 / (465 + 1.2×172 + 130 + 0.8×264)] of such units.

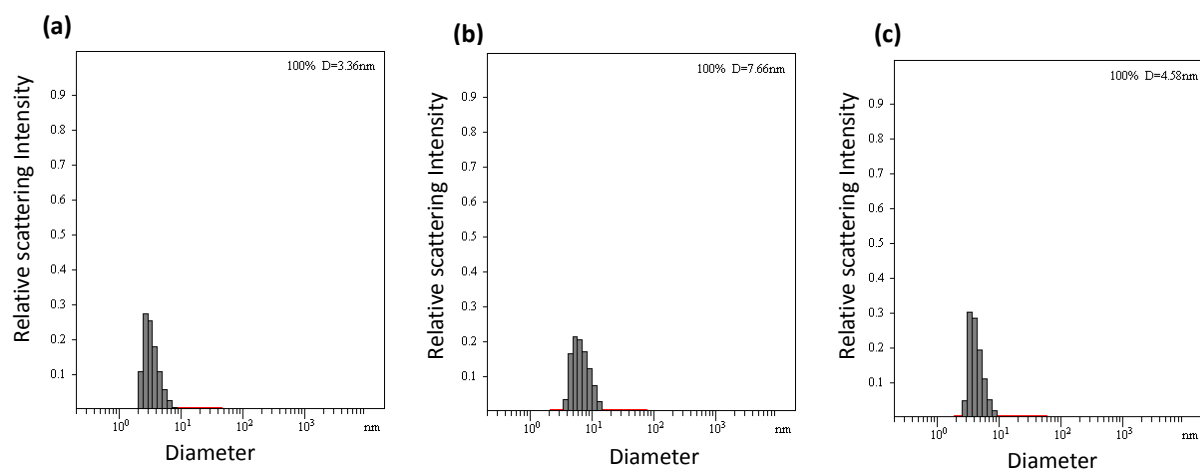

**Figure S11.** Distribution of the hydrodynamic diameters of the nanoparticles in water as determined by DLS for (a) alkynyl-SCM, (b) surface-functionalized SCM and (c) MINP(**10**) after purification.

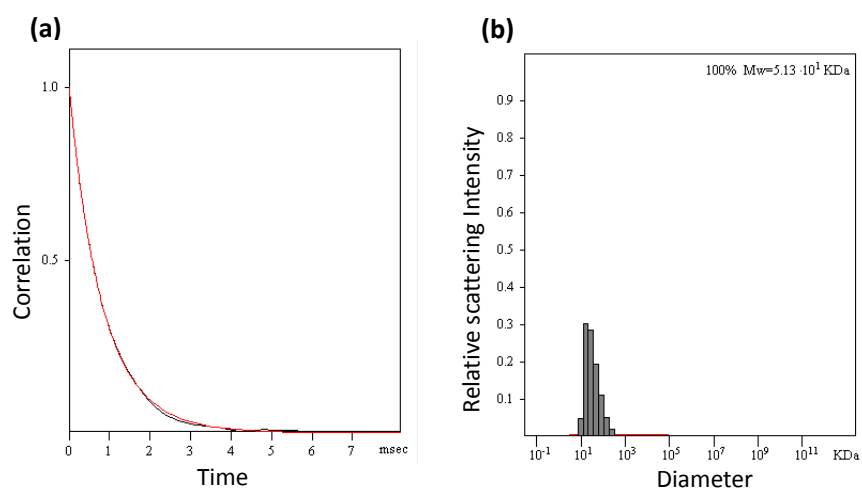

**Figure S12.** Distribution of the molecular weights and the correlation curves for MINP(**10**) from the DLS. The PRECISION DECONVOLVE program assumes the intensity of scattering is proportional to the mass of the particle squared. If each unit of building block for the MINP is assumed to contain one molecule of compound **1** (MW = 465 g/mol), 1.2 molecules of compound **2** (MW = 172 g/mol), one molecule of DVB (MW = 130 g/mol), 0.8 molecules of compound **3** (MW = 264 g/mol), and 0.04 molecules of 4-vinylphenylboronic acid (MW = 148 g/mol), the molecular weight of MINP translates to 51 [= 51300 / (465 + 1.2×172 + 130 + 0.8×264)] of such units.

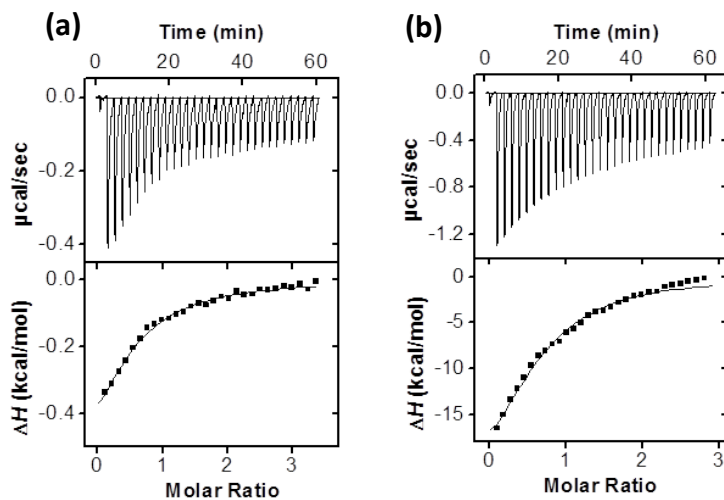

**Figure S13.** ITC titration curves obtained at 298 K for the binding of (a) **5** (3.0 mM) by MINP(**4**) (0.2 mM) and (b) **6** (0.15 mM) by MINP(**4**) (12  $\mu\text{M}$ ) in Millipore water. The data correspond to entries 3 and 4, respectively, in Table 1.

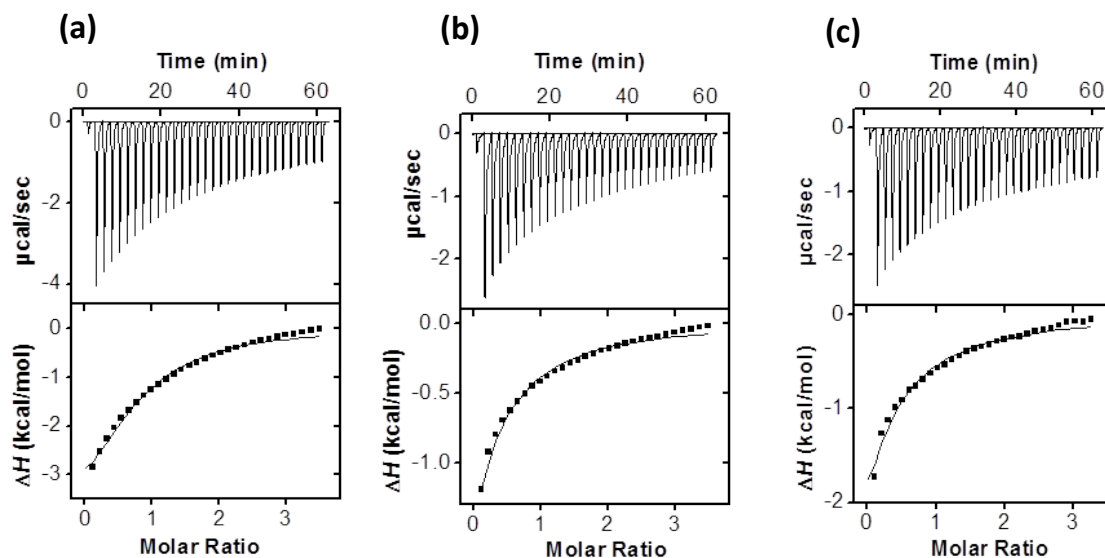

**Figure S14.** ITC titration curves obtained at 298 K for the binding of (a) **7** (3.0 mM) by MINP(**4**) (0.2 mM), (b) **8** (3.0 mM) by MINP(**4**) (0.2 mM) and (c) **9** (3.5 mM) by MINP(**4**) (0.25 mM). The data correspond to entries 5, 6, and 7, respectively, in Table 1.



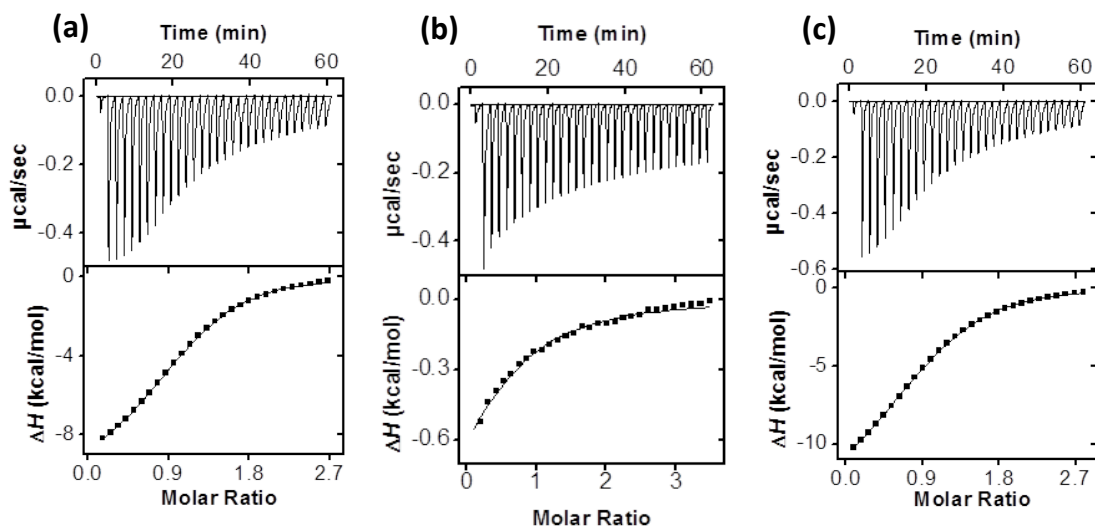

**Figure S15.** ITC titration curves obtained at 298 K for the binding of (a) **4** (0.12 mM) by MINP(**6**) (10  $\mu$ M), (b) **5** (3.0 mM) by MINP(**6**) (0.2 mM), and (c) **6** (2.4 mM) by MINP(**6**) (0.2 mM). The data correspond to entries 8, 9, and 10, respectively, in Table 1.

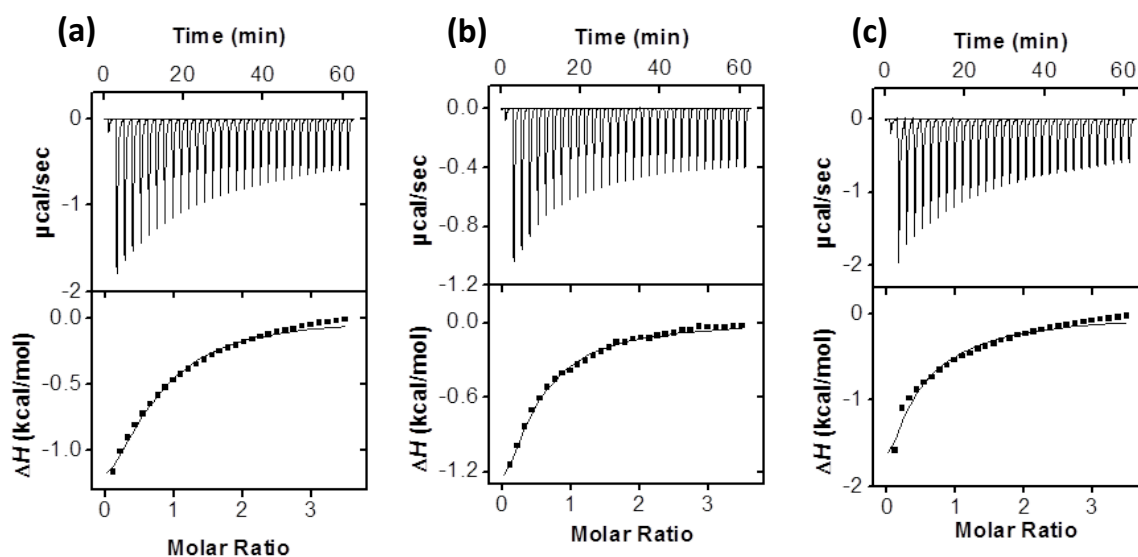

**Figure S16.** ITC titration curves obtained at 298 K for the binding of (a) **7** (3.0 mM) by MINP(**6**) (0.2 mM), (b) **8** (3.0 mM) by MINP(**6**) (0.2 mM) and (c) **9** (3.0 mM) by MINP(**6**) (0.2 mM). The data correspond to entries 11, 12, and 13, respectively, in Table 1.

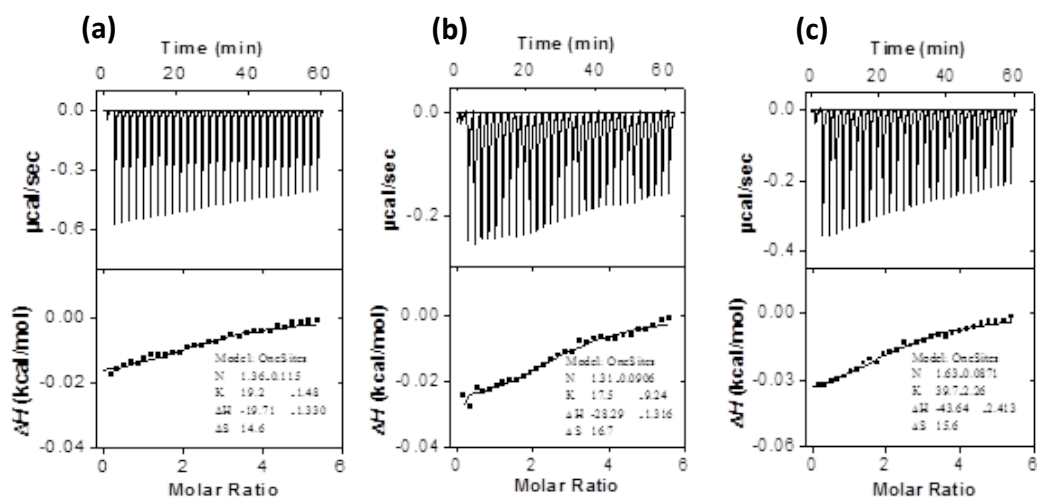

**Figure S17.** ITC titration curves obtained at 298 K for the binding of (a) **4**, (b) **5**, and (c) **6** MINP(**7**) (0.2 mM). The concentration of each guest was 6.0 mM. The data correspond to entries 14, 15, and 16, respectively, in Table 1.

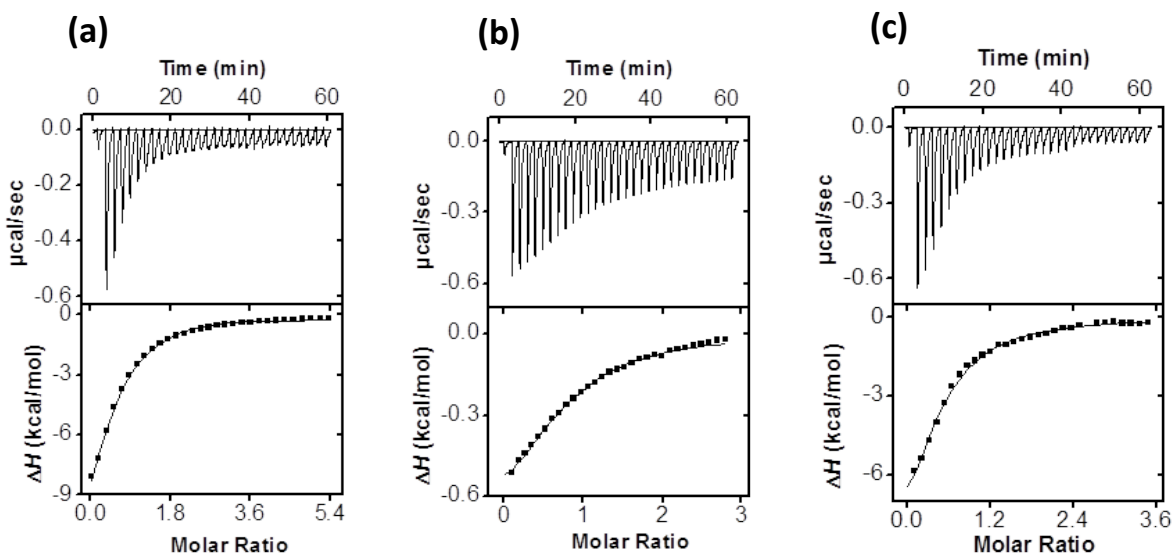

**Figure S18.** ITC titration curves obtained at 298 K for the binding of (a) **7** (0.24 mM) by MINP(**7**) (10  $\mu$ M), **8** (2.4 mM) by MINP(**7**) (0.2 mM), and (b) **9** (0.3 mM) by MINP(**7**) (20  $\mu$ M). The data correspond to entries 17, 18, and 19, respectively, in Table 1.

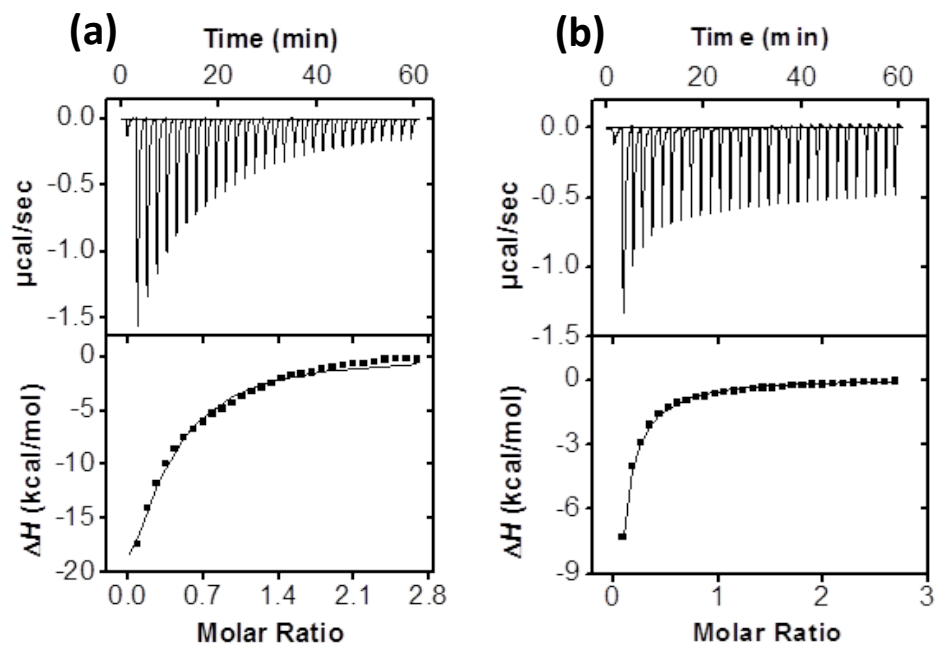

**Figure S19.** ITC titration curves obtained at 298 K for the binding of (a) **10** (0.12 mM) by MINP(**10**) (10  $\mu$ M) and (b) **11** (0.12 mM) by MINP(**10**) (10  $\mu$ M). The data correspond to entries 20 and 21, respectively, in Table 1.

# $^1\text{H}$ and $^{13}\text{C}$ NMR spectra

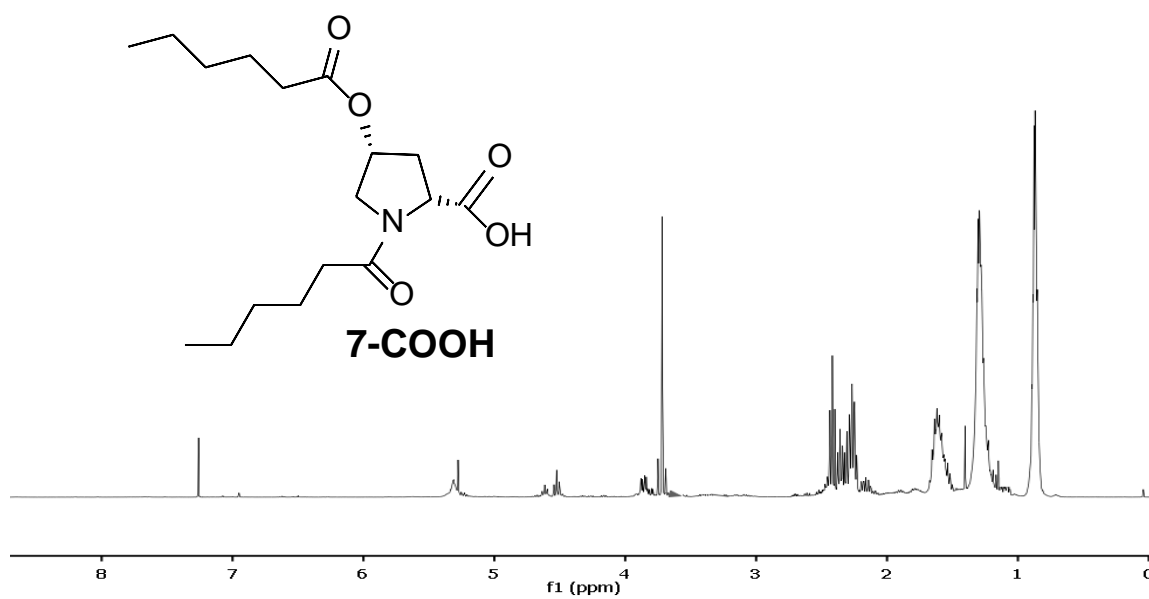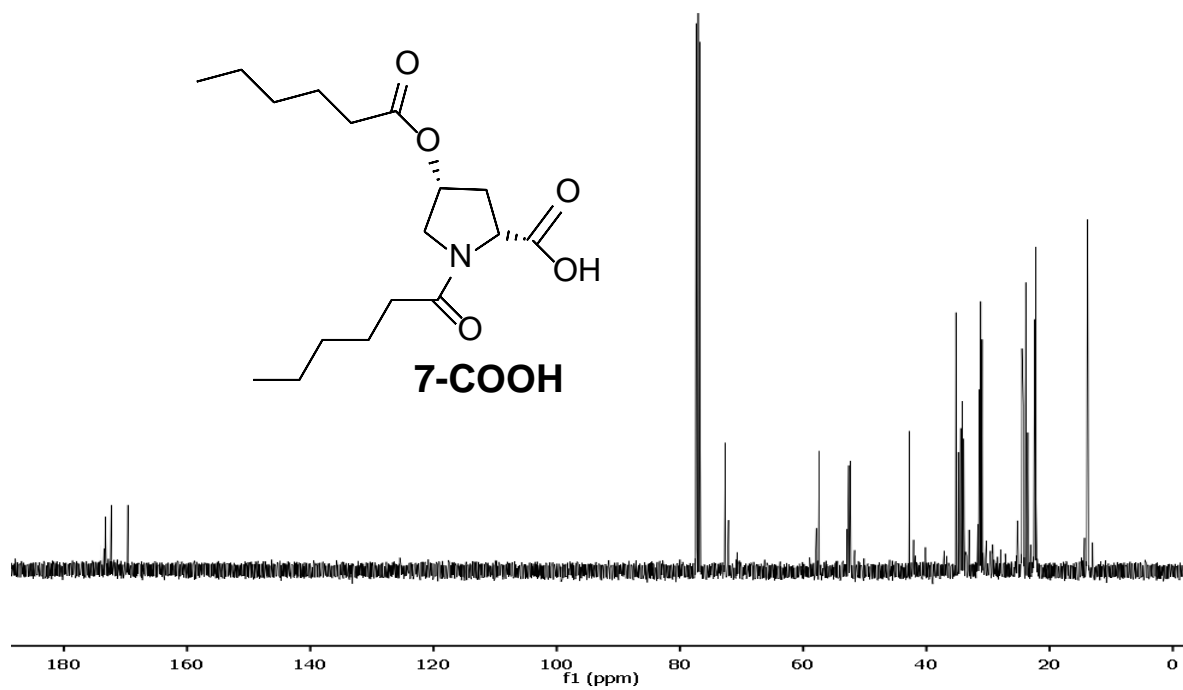

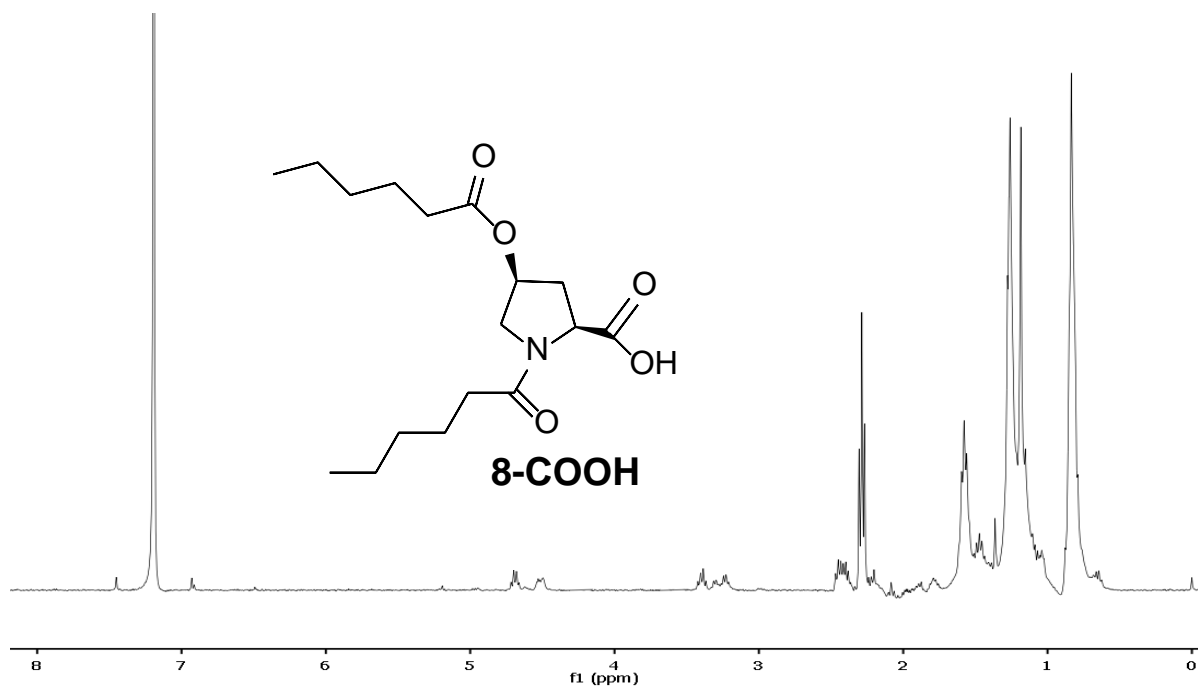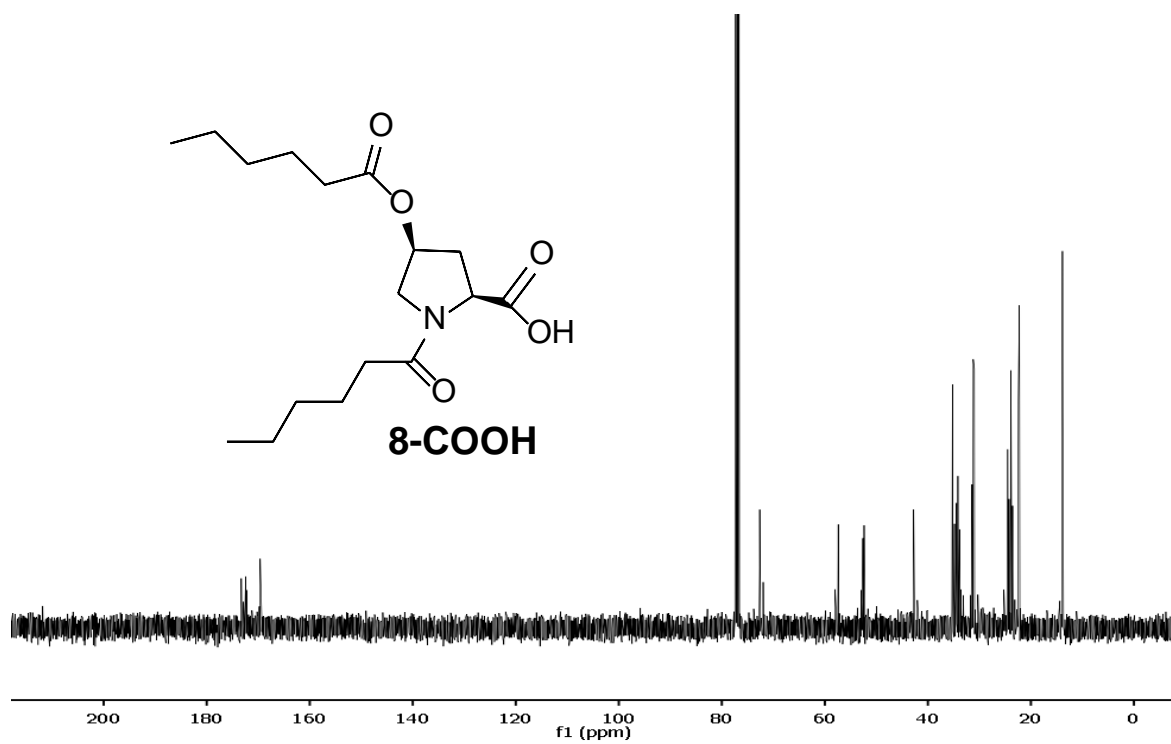

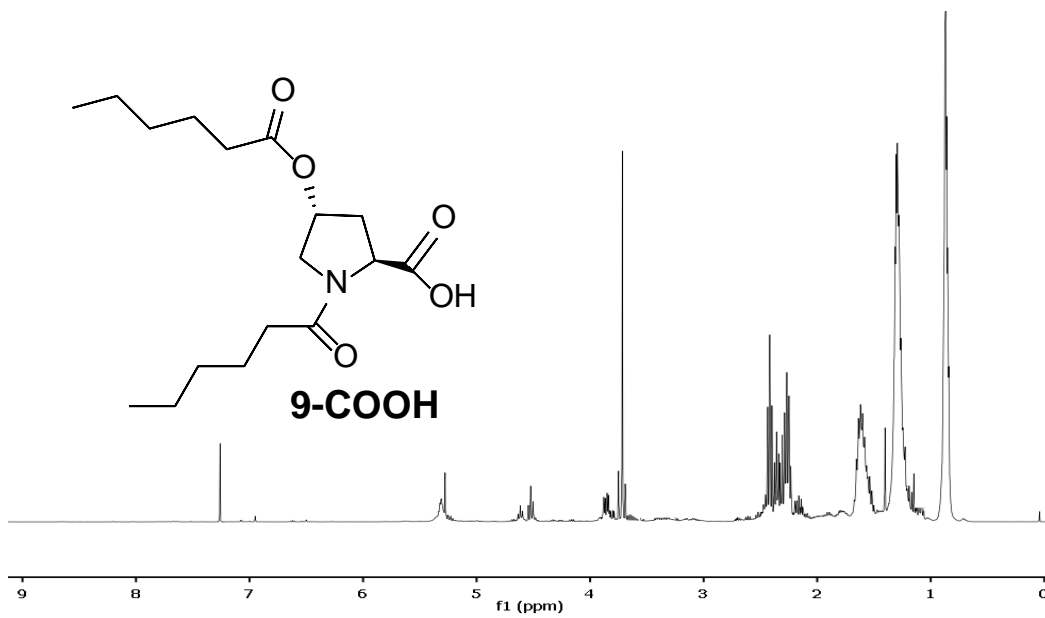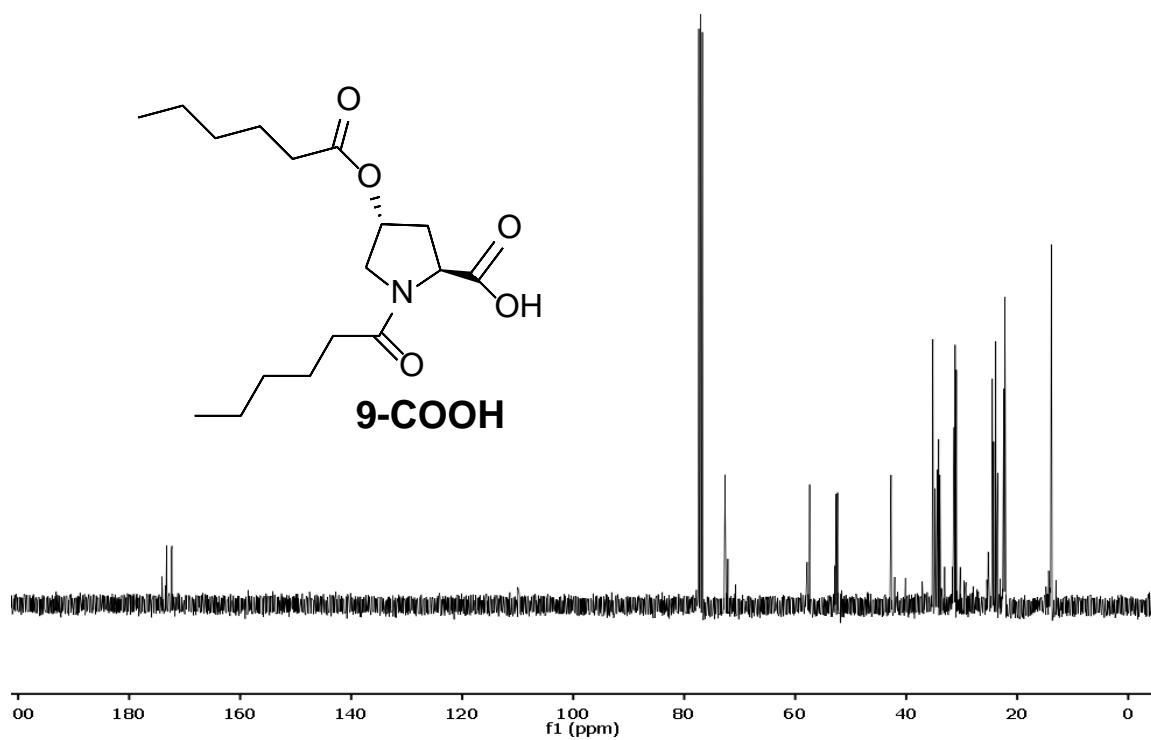

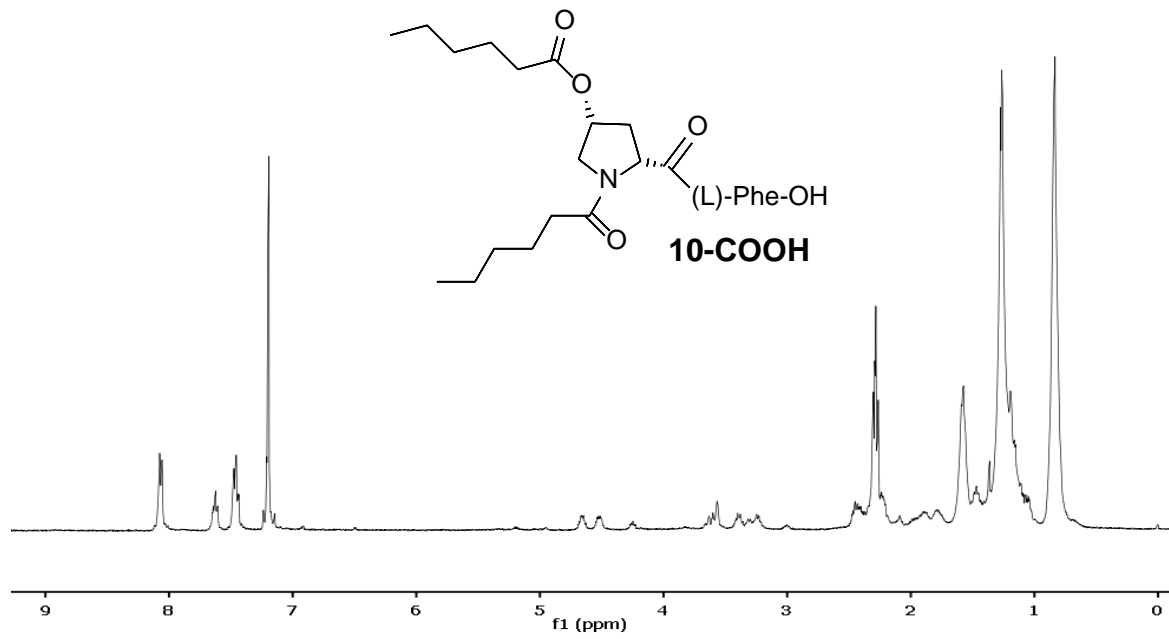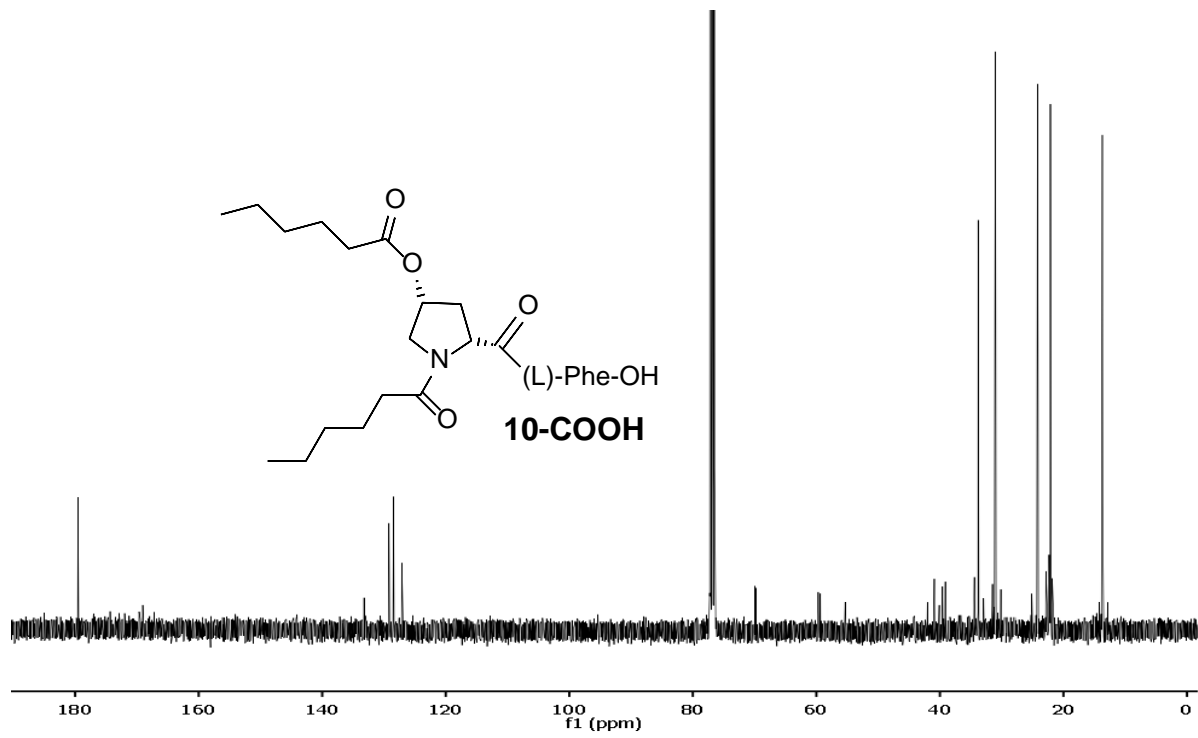

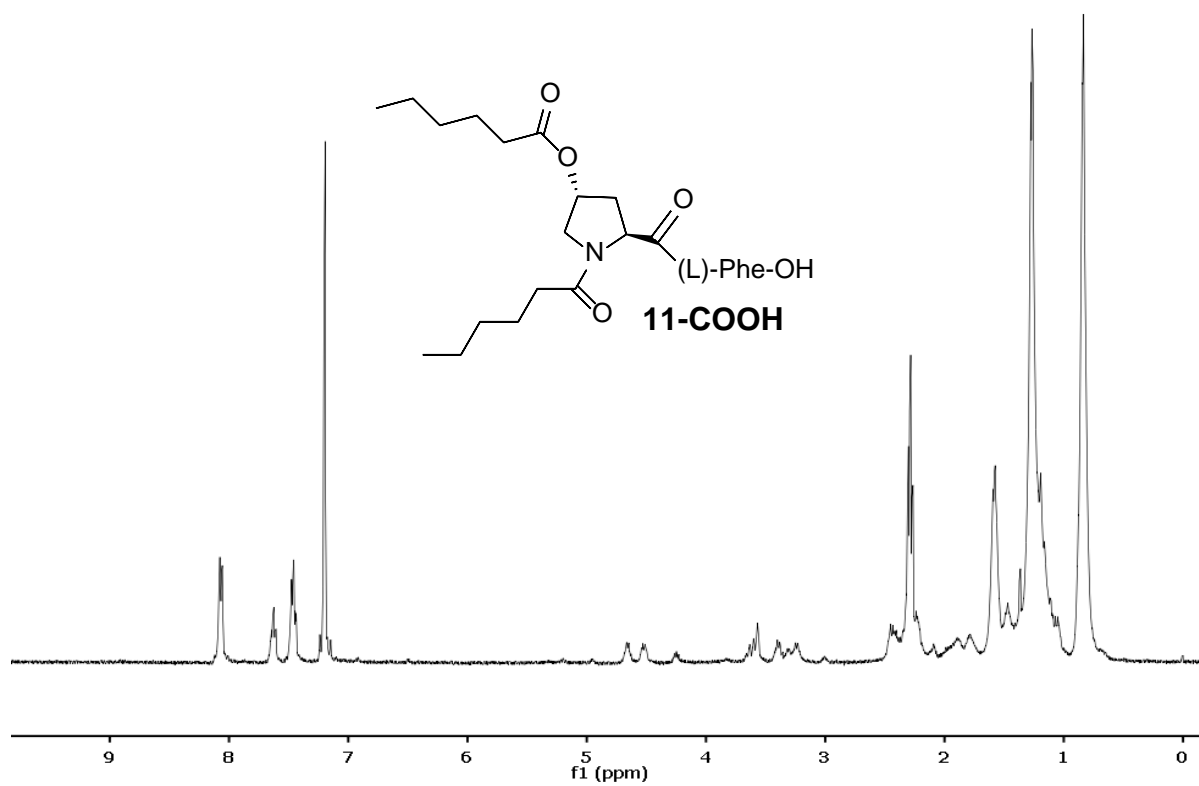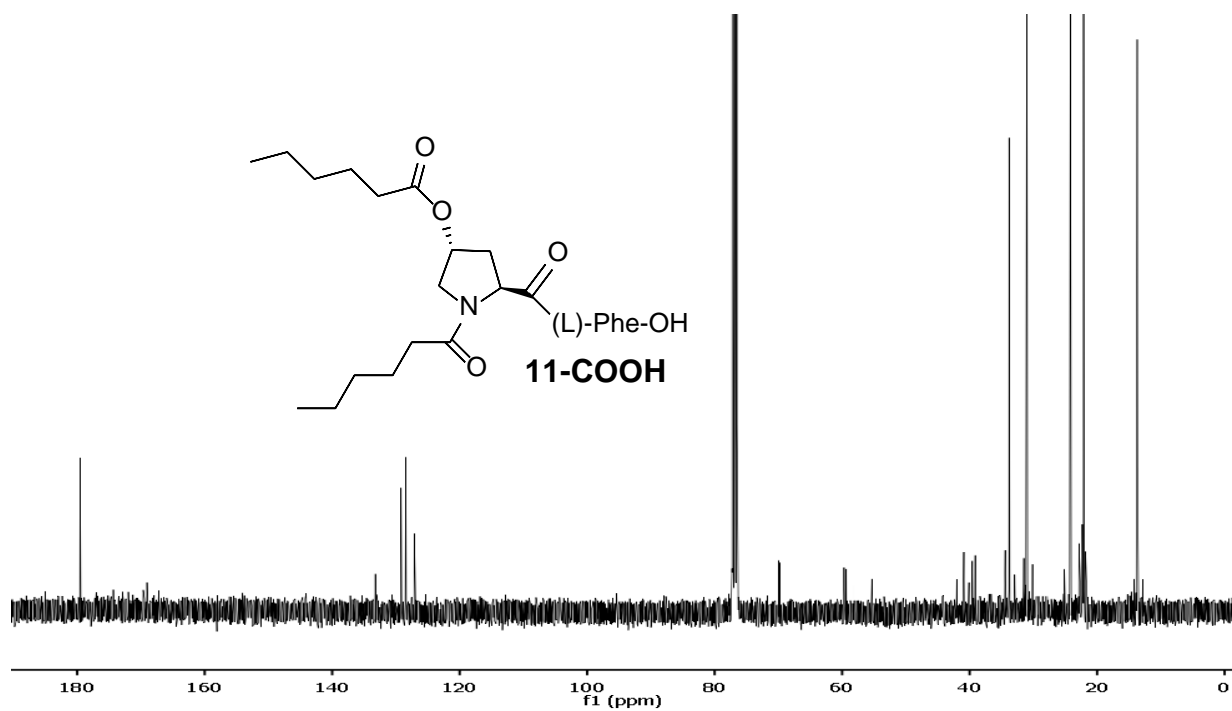

Supplement: c7ob00764g1.pdf [file c7ob00764g1.pdf]
